# Supplementary material for: Peptidomic Characterization and Amino Acid Availability after Intake of Casein vs. a Casein Hydrolysate in a Pig Model
Source: MDPI journal article supplement (doi:10.3390/nu15051065), 2023-02-21
Supplement: s1 [file s1]

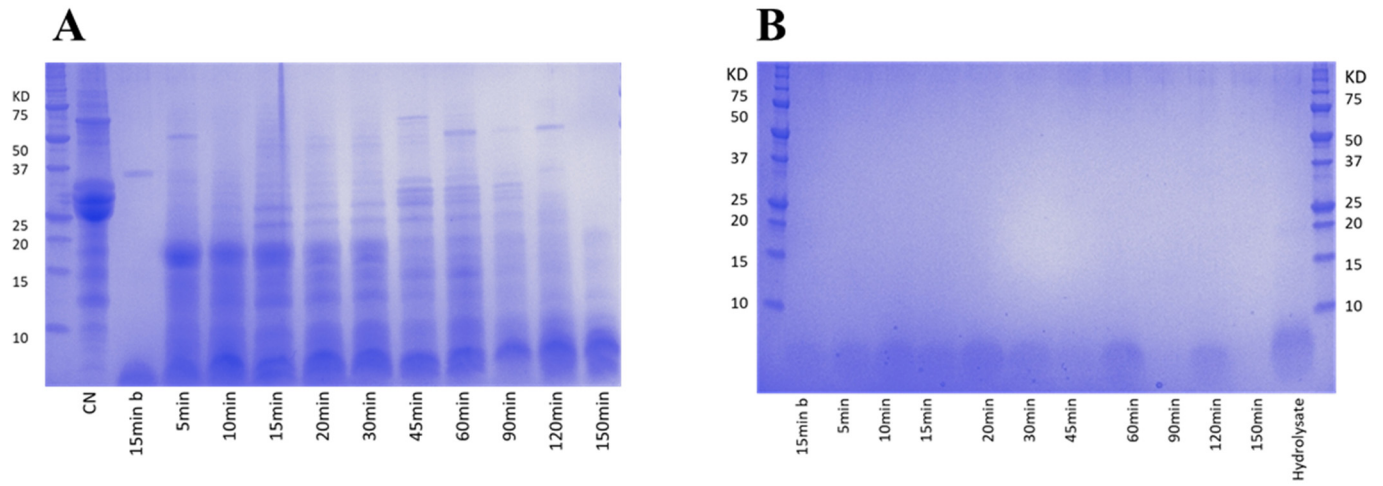

**Figure S1.** Electrophoretic profile of pig duodenal effluents at different times of digestion after intake of casein (A) and hydrolysate (B) compared with the undigested substrate.

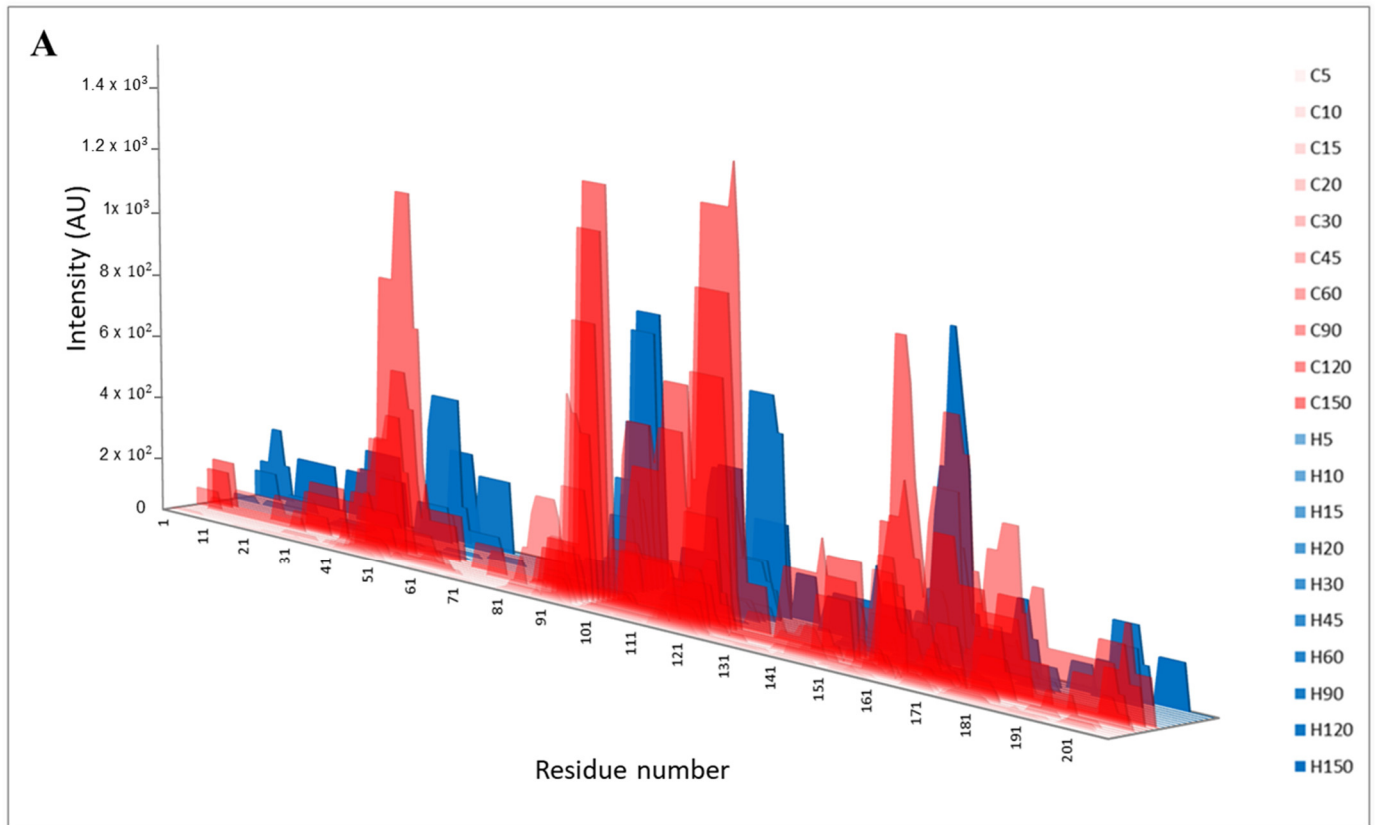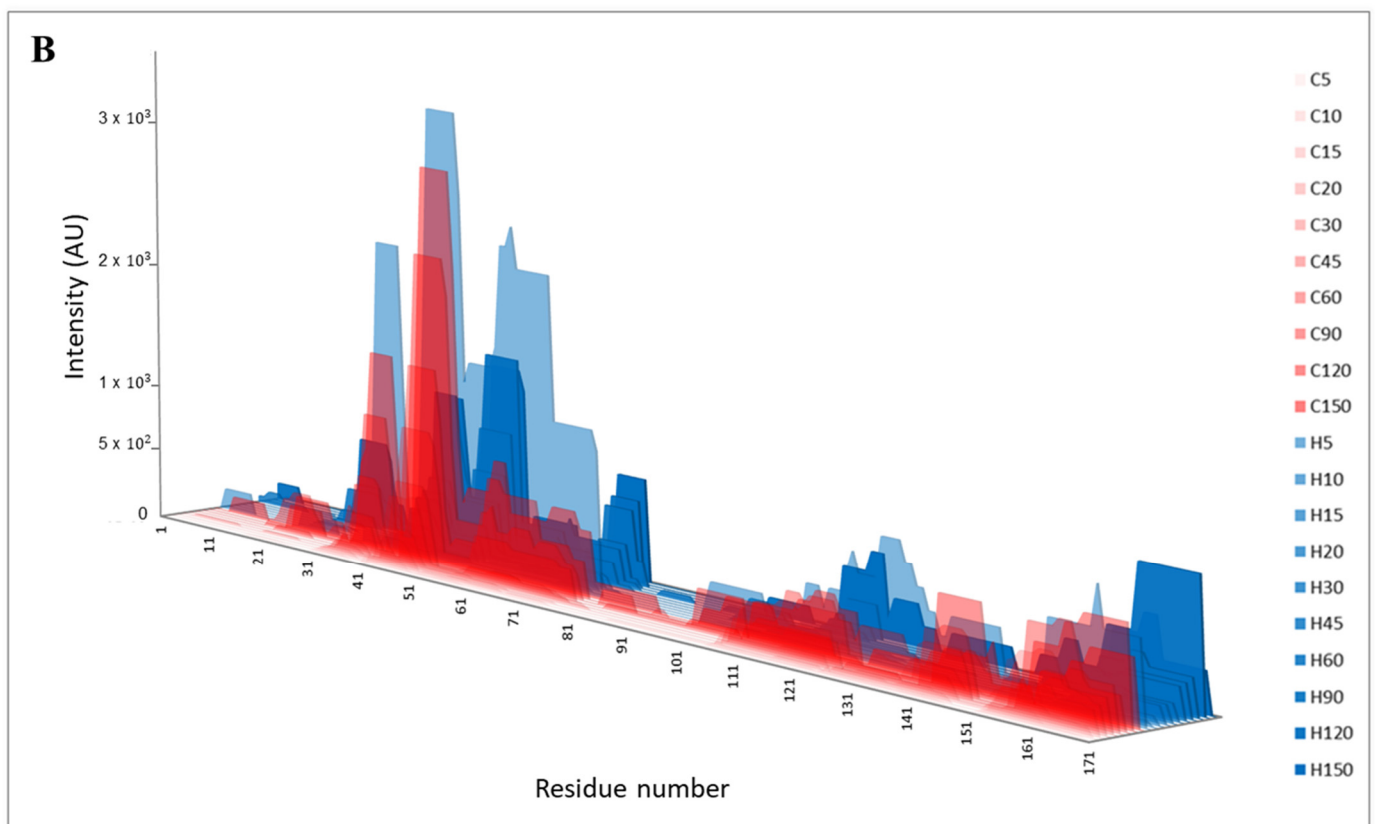

**Figure S2.** Identified peptides in pig duodenal digests after intake of casein (C) or hydrolysate (H) over collection time represented by area graphs. The height (Y-axis) is proportional to the sum of the identified peptide intensities. Profile peptides from  $\alpha_{s1}$ -casein (A) and  $\kappa$ -casein (B).

**A** **$\beta$ -casein  
Casein**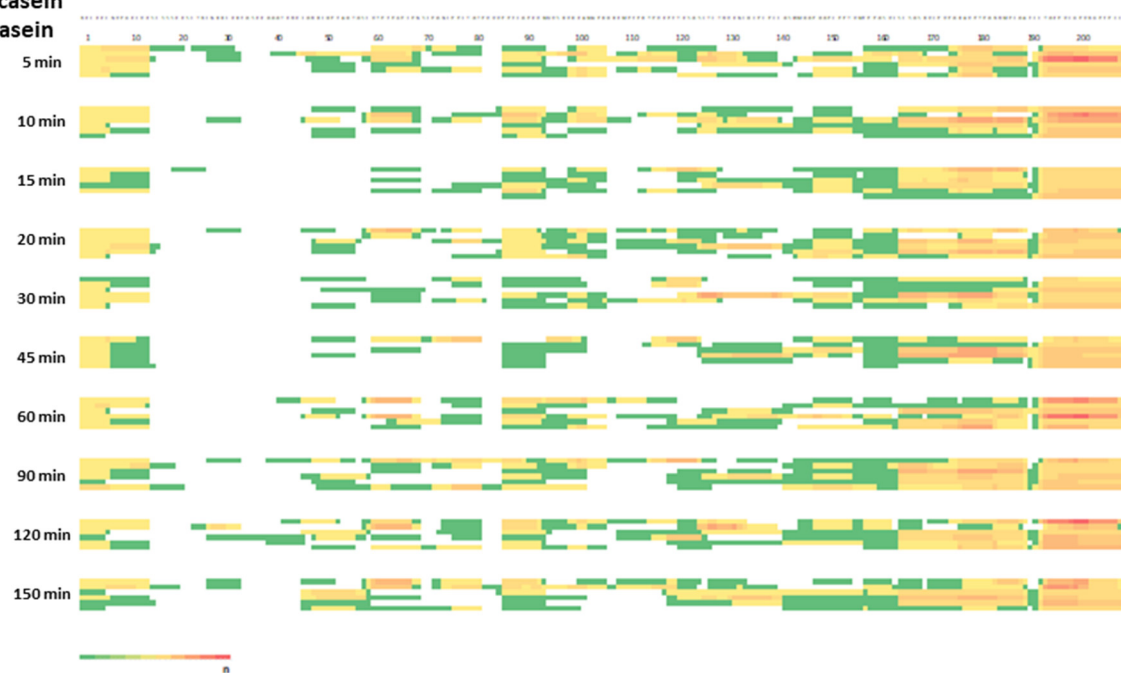**B** **$\beta$ -casein  
Hydrolysate**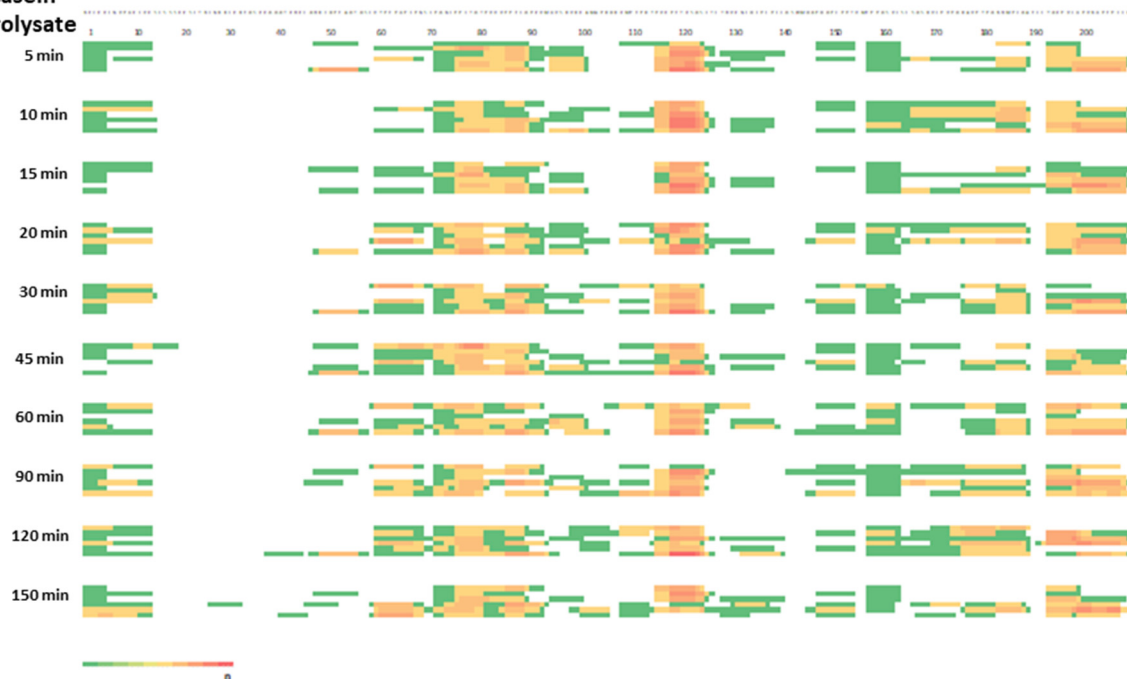

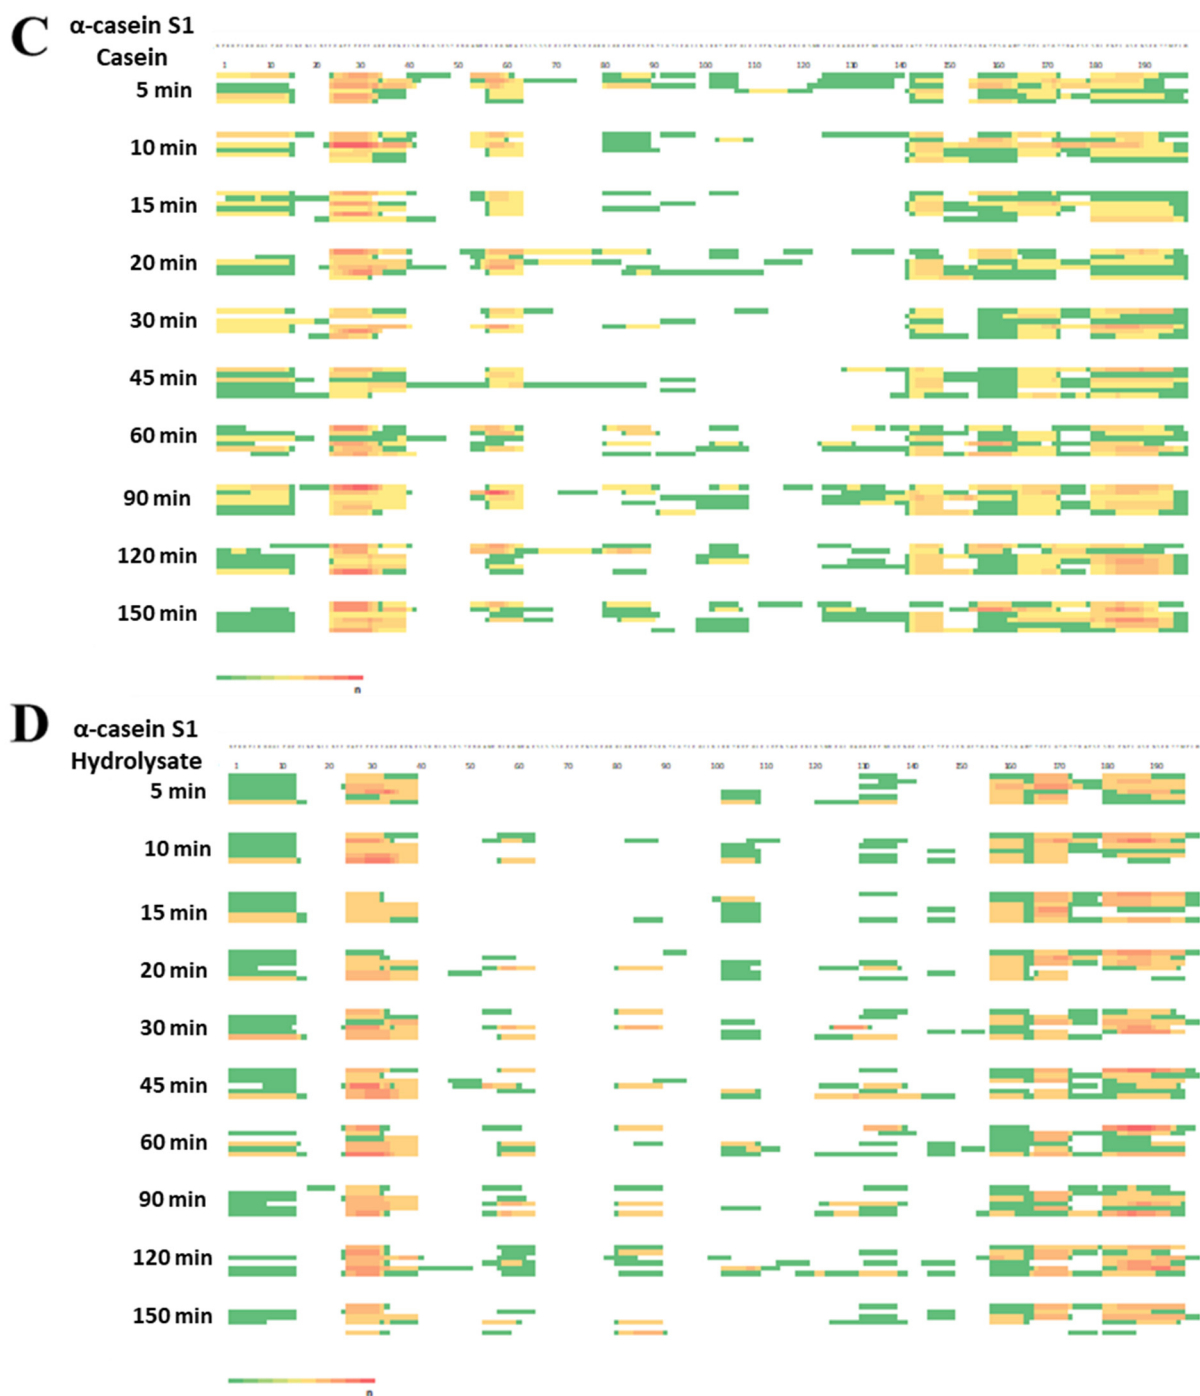

**Figure S3.** Alignment of peptides identified in pig duodenal effluents ( $n=6$ ) collected at different times of digestion after intake of casein (A, C) or hydrolysate (B, D) and represented as heatmaps of  $\beta$ -casein (A, B) and  $\alpha_{s1}$ -casein (C, D). Each line at each time point represents a different subject ( $n=6$ ).

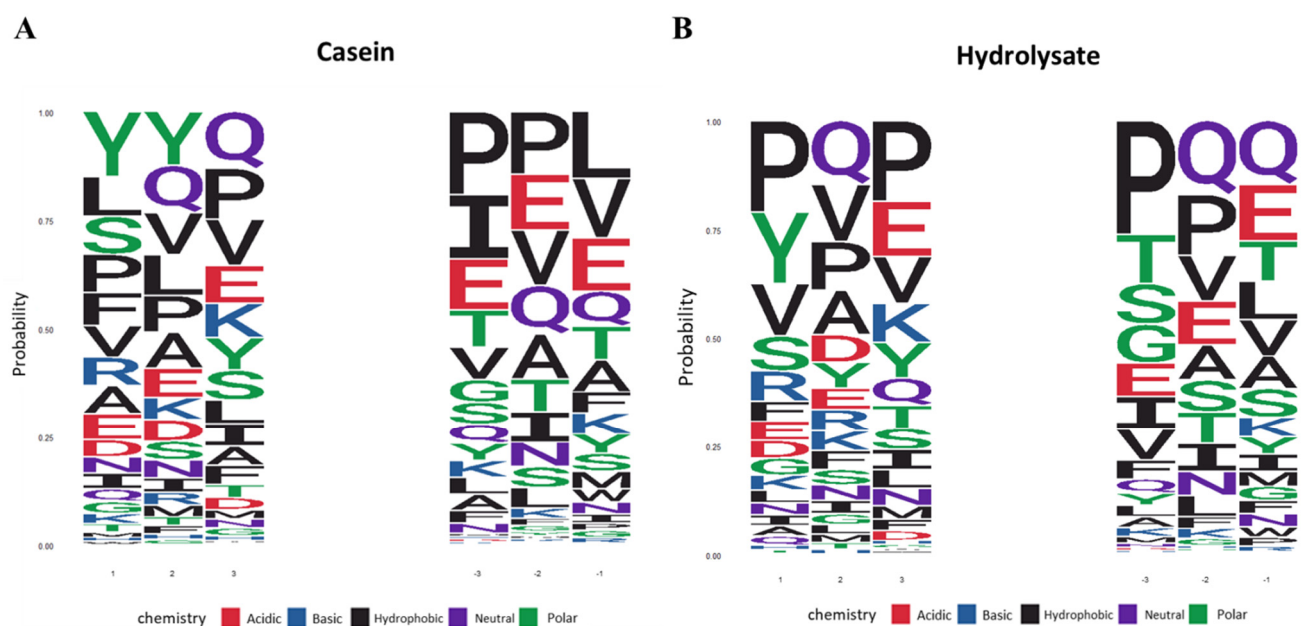

**Figure S4.** SeqLogo analysis of terminal amino acid residues corresponding to the peptides identified in pig duodenal effluents ( $n=6$ ) at basal (-15 min), 5, 10, 15, 20, 30, 45, 60, 90, 120, and 150 min after intake of casein (A) or hydrolysate (B).

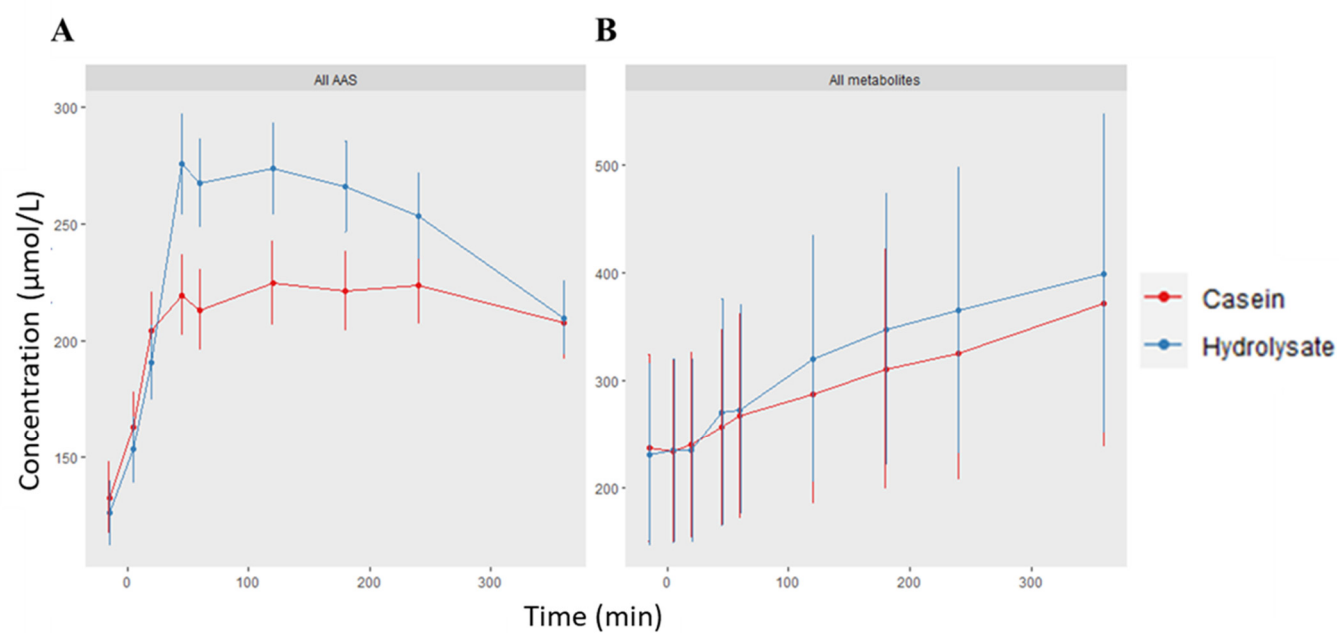

**Figure S5.** Total amino acids (A) and metabolites (B) determined in plasma at baseline (-15 min) and 5, 20, 45, 60, 120, 180, 240 and 360 min after intake of casein or hydrolysate in the pig model ( $n=6$ ).

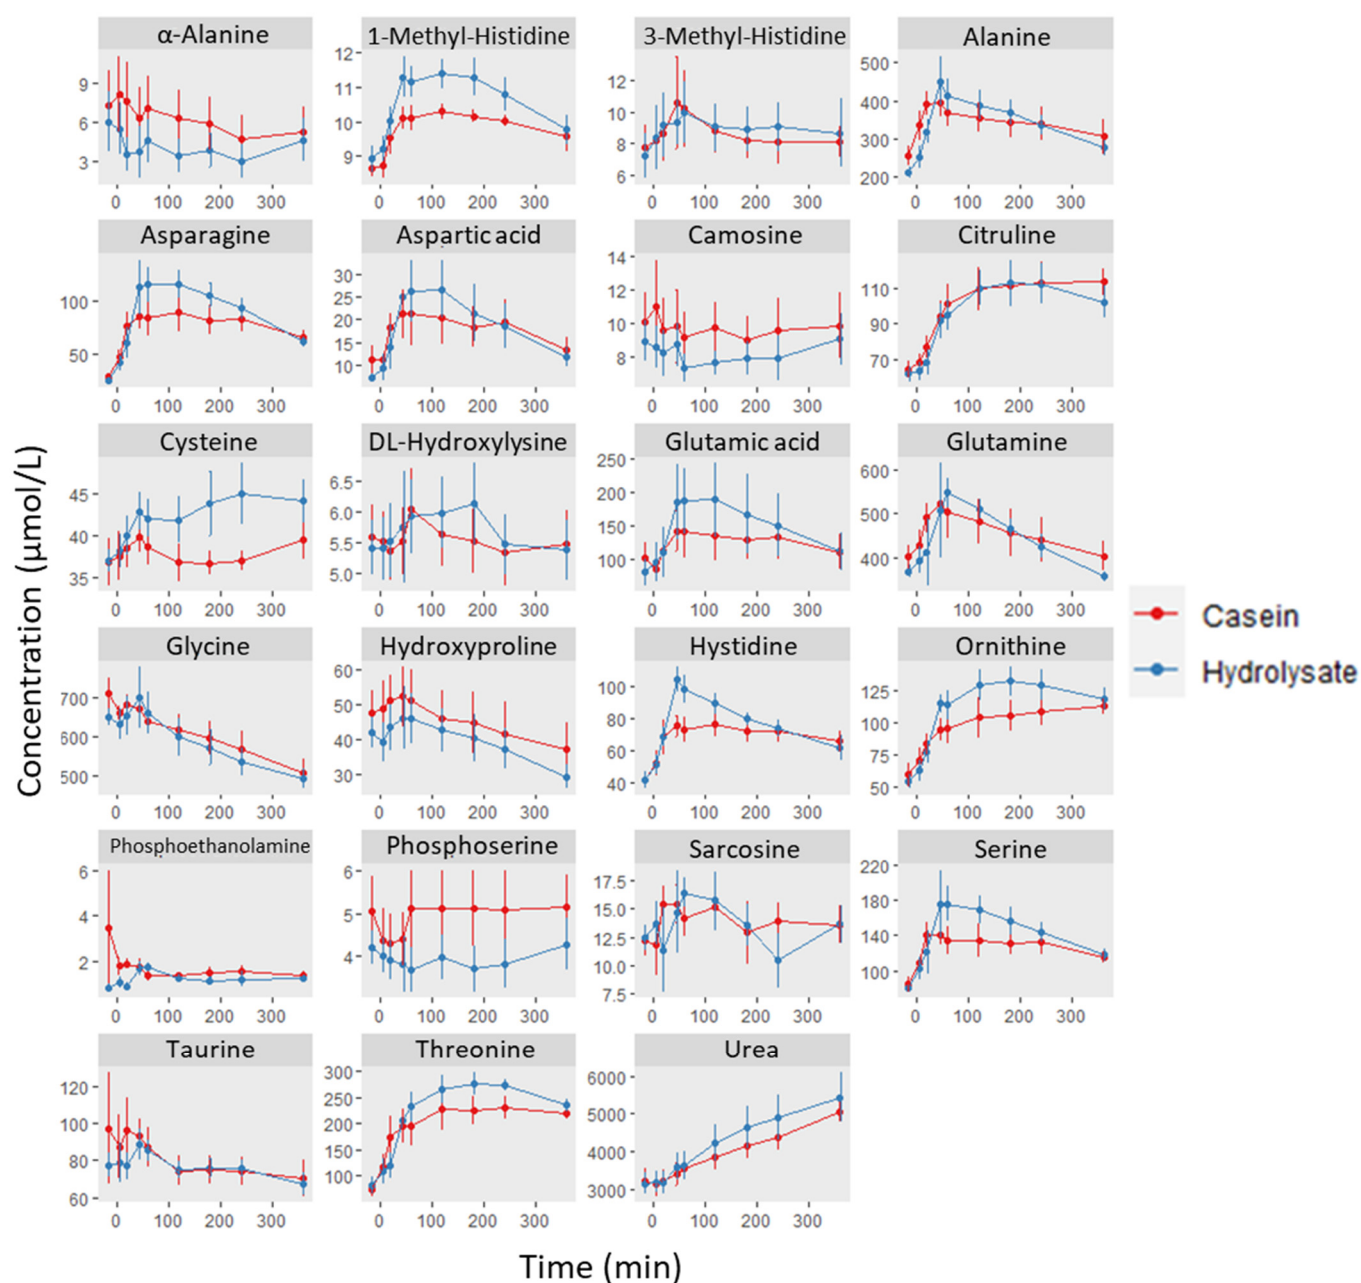

**Figure S6.** Concentration of amino acids in plasma of pigs ( $n=6$ ) at baseline (-15 min) and 5, 20, 45, 60, 120, 180, 240 and 360 min after intake of casein or hydrolysate.

**Table S1.** Pig endogenous proteins identified in duodenal effluents.

| <b>Protein</b>                                 | <b>Accession<br/>number<sup>1</sup></b> | <b>Function</b>                                                                                 |
|------------------------------------------------|-----------------------------------------|-------------------------------------------------------------------------------------------------|
| Pancreatic triacylglycerol lipase              | P00591                                  | Digestive<br>enzymes                                                                            |
| Lipoprotein lipase                             | P49923                                  |                                                                                                 |
| Pepsin A                                       | P00791                                  |                                                                                                 |
| Chymotrypsin-like elastase family<br>member 2A | P08419                                  |                                                                                                 |
| Pancreatic alpha-amylase                       |                                         |                                                                                                 |
| Trypsin                                        | P00761                                  |                                                                                                 |
| Dipeptidyl peptidase 4                         | P22411                                  |                                                                                                 |
| Carboxypeptidase A1                            | P09954                                  |                                                                                                 |
| Aminopeptidase                                 | P15145                                  |                                                                                                 |
| Pro-glucagon                                   | P01274                                  | Enteroendocrine<br>regulation                                                                   |
| Appetite-regulating hormone<br>(Ghrelin)       | Q9GKY5                                  |                                                                                                 |
| Gastrin-releasing peptide                      | P63153                                  |                                                                                                 |
| Gastrin/cholecystokinin type B<br>receptor     | A0A287A2K5                              |                                                                                                 |
| Mucin-5AC                                      | A0A4X1UGK3                              | Lubrication,<br>maintenance of<br>integrity of<br>tissue lining                                 |
| Serum albumin                                  | P08835                                  | Maintenance of<br>colloid osmotic<br>pressure (from<br>plasma into<br>stomach and<br>intestine) |

<sup>1</sup>Compiled from the UniProtKB Protein Database
